# Supplementary material for: Development of a novel detection system for microbes from bovine diarrhea by real-time PCR
Source: PubMed Central journal article supplement — J Vet Med Sci. 2015 Nov 30;78(3):383–9. doi: 10.1292/jvms.15-0552 (PMC4829504; doi:10.1292/jvms.15-0552), 2015-11-30

Fig. S1 (A). Standard curves using synthesized DNA

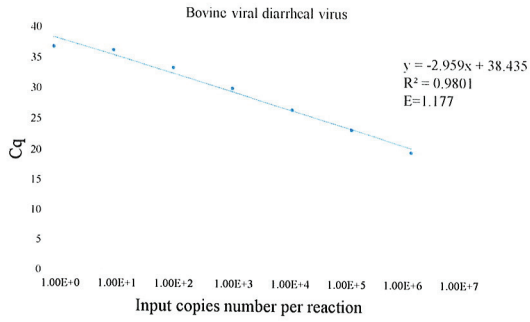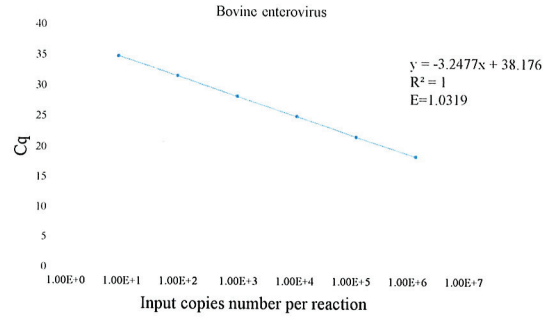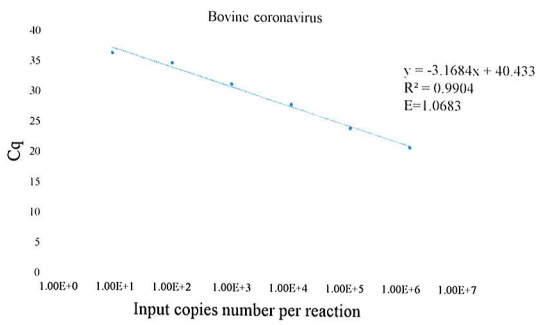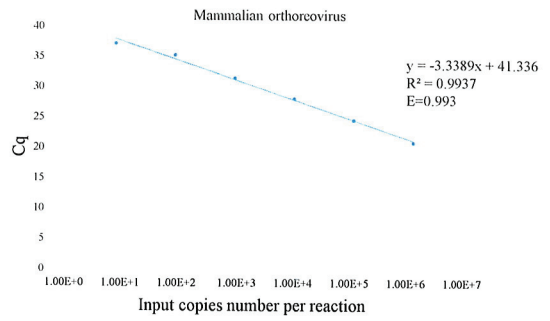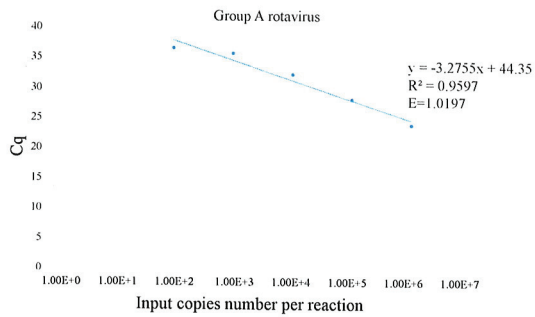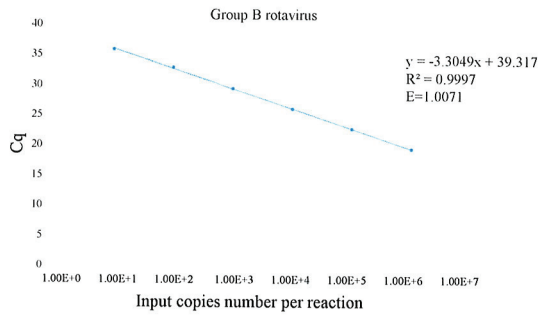

Fig. S1 (B). Standard curves using synthesized DNA

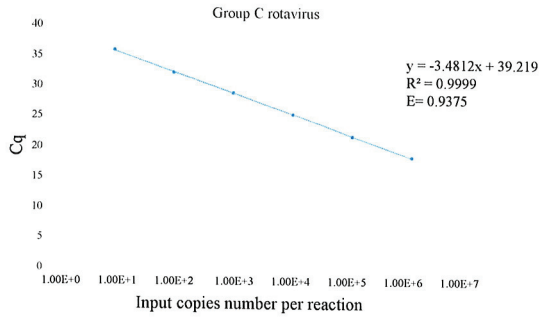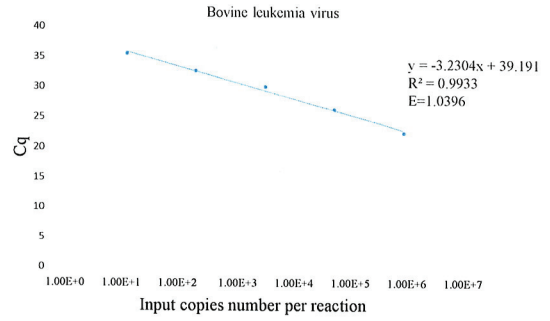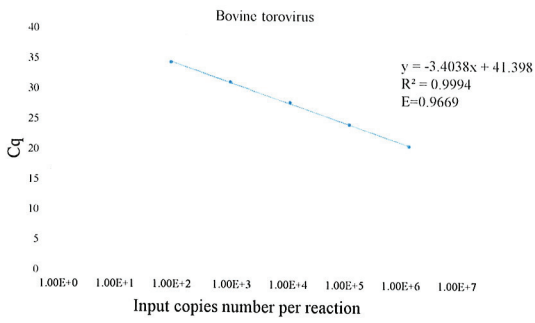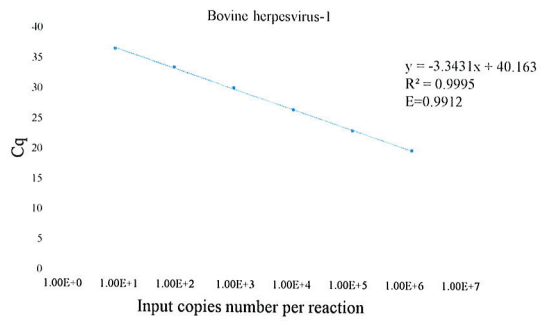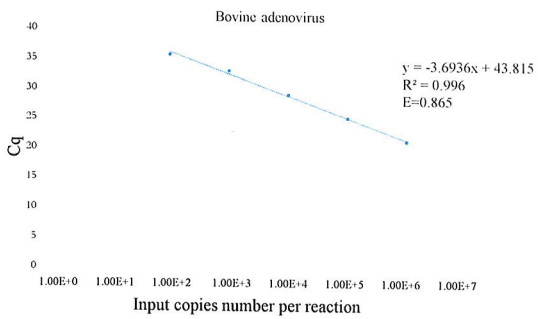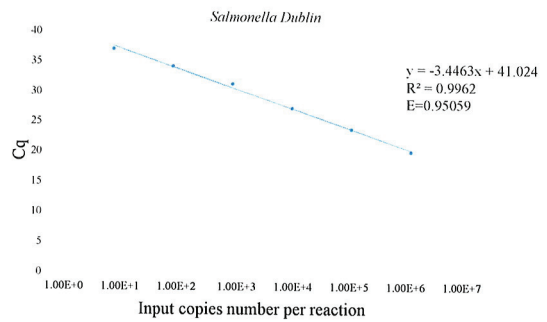

Fig. S1 (C). Standard curves using synthesized DNA

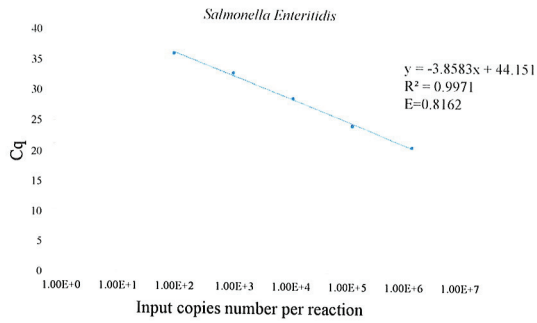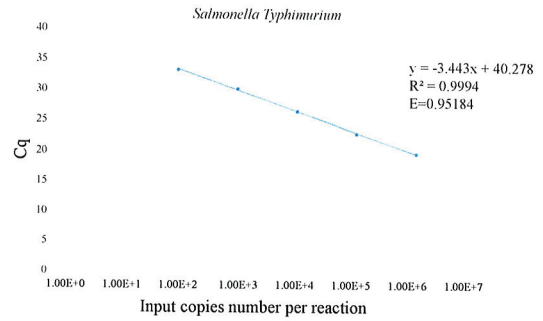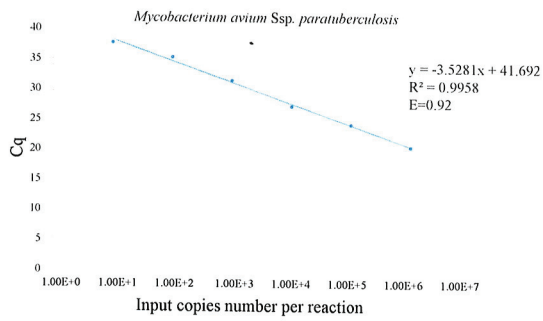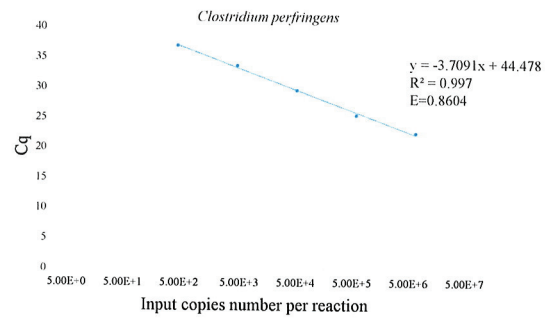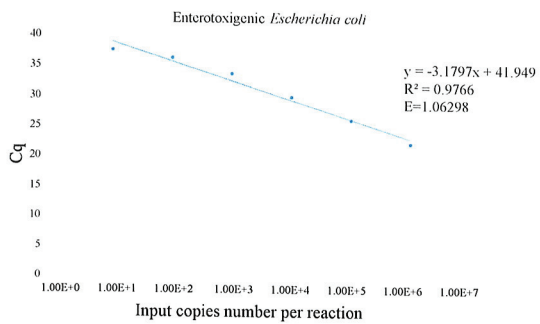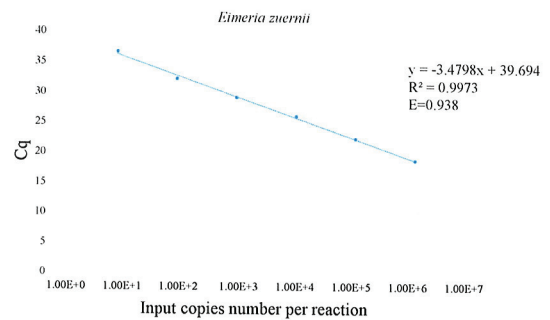

Fig. S1 (D). Standard curves using synthesized DNA

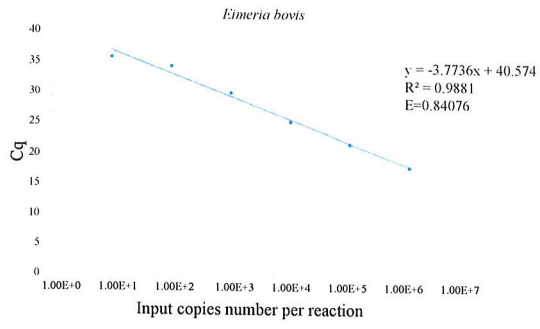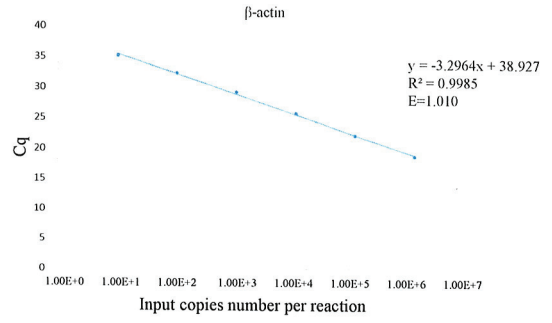

Supplement: jvms-78-383-s001.pdf [file jvms-78-383-s001.pdf]
